# Supplementary material for: Identification and phylogenetic analysis of Dictyostelium discoideum kinesin proteins
Source: Springer Nature journal article supplement (doi:10.1186/1471-2164-4-47), 2003-11-27
Supplement: Additional file 1 [file 1471-2164-4-47-s1.pdf]

| Organism                                    | Gen name                  | old/alternative name                                                                | class                                     | protein accession | length [aa] | MD       |         |
|---------------------------------------------|---------------------------|-------------------------------------------------------------------------------------|-------------------------------------------|-------------------|-------------|----------|---------|
| Arabidopsis thaliana (Mouse-ear cress)      | Kif1                      | KATA OR AT4G21270 OR F7J7.210                                                       | C-1                                       | Q07970            | 793         | 420-780  |         |
|                                             | Kif2                      | KATB OR AT4G27180 OR T24A18.130                                                     | C-1                                       | P46864            | 745         | 385-732  |         |
|                                             | Kif3                      | KATC OR AT5G54670 OR K5F14.1 OR MRB17.18                                            | C-1                                       | P46875            | 754         | 394-741  |         |
|                                             | Kif4                      | KATD                                                                                | M-2                                       | O81635            | 987         | 392-729  |         |
|                                             | Kif5                      |                                                                                     | C-4                                       | AA436167.1        | 1260        | 886-1217 |         |
|                                             | Kif6                      | AT2G37420                                                                           | N-2                                       | Q9ZUS4            | 1022        | 46-389   |         |
|                                             | Kif7                      | AT2G36200 OR F2H17.19                                                               | N-2                                       | P82266            | 1056        | 10-367   |         |
|                                             | Kif8                      | AT2G28620                                                                           | N-2                                       | Q9SIB3            | 1076        | 48-400   |         |
|                                             | Kif9                      | AT4G14330                                                                           | n.c.                                      | O232391           | 959         | 46-375   |         |
|                                             | Kif10                     | T19F6.160 OR AT4G24170                                                              | N-14                                      | Q9SU42            | 1263        | 4-334    |         |
|                                             | Kif11                     | T32N15.10                                                                           | M-2                                       | O22240            | 767         | 288-600  |         |
|                                             | Kif12                     | AT2G47500                                                                           | M-2                                       | AA042115          | 983         | 397-732  |         |
|                                             | Kif13                     | T12M4.14 protein                                                                    | M-2                                       | O80491            | 1032        | 446-754  |         |
|                                             | Kif14                     | TSA14.3 protein                                                                     | N-17                                      | Q9ZVV2            | 887         | 89-417   |         |
|                                             | Kif15                     | AT2G22610                                                                           | M-2                                       | Q9ZQ52            | 1068        | 425-732  |         |
|                                             | Kif16                     | F19H22.50 OR AT4G38950                                                              | N-14                                      | Q9SVJ8            | 834         | 11-341   |         |
|                                             | Kif17                     | AT4G39050                                                                           | N-7                                       | Q8RWW4            | 1055        | 96-423   |         |
|                                             | Kif18                     | AT2G21300                                                                           | N-14                                      | Q9S1U7            | 581         | 22-369   |         |
|                                             | Kif19                     | AT2G21380                                                                           | N-7                                       | Q9SJU0            | 1058        | 102-429  |         |
|                                             | Kif20                     | F8K7.17 protein                                                                     | N-7                                       | Q9XIO3            | 909         | 73-415   |         |
|                                             | Kif21                     | F28P10.150                                                                          | n.c.                                      | Q9SV36            | 1070        | 121-468  |         |
|                                             | Kif22                     | F14P13.9                                                                            | M-2                                       | Q9S542            | 897         | 336-635  |         |
|                                             | Kif23                     | F14P13.22                                                                           | N-7                                       | Q9SS30            | 459         | 13-337   |         |
|                                             | Kif24                     | F24D7.17                                                                            | M-2                                       | Q9CAC9            | 1056        | 463-792  |         |
|                                             | Kif25                     | ZCF1.25                                                                             | N-7                                       | Q9S7P3            | 823         | 1-333    |         |
|                                             | Kif26                     | T9C5.240                                                                            | N-8                                       | Q9SC14            | 913         | 13-363   |         |
|                                             | Kif27                     | F25P22.28                                                                           | M-2                                       | Q9C9S6            | 1050        | 527-871  |         |
|                                             | Kif28                     | F15H18.10                                                                           | M-2                                       | Q9LPQ7            | 1162        | 619-977  |         |
|                                             | Kif29                     | ANACK1 kinesin-like protein                                                         | N-14                                      | Q8S905            | 974         | 29-361   |         |
|                                             | Kif30                     | F24M12.190                                                                          | N-14                                      | Q9SD31            | 968         | 15-349   |         |
|                                             | Kif31                     | AT4G05190                                                                           | C-1                                       | Q9MOX6            | 777         | 413-784  |         |
|                                             | Kif32                     | F16L2_60                                                                            | N-2                                       | Q9LZU5            | 1058        | 46-398   |         |
|                                             | Kif33                     | T1E22_130                                                                           | n.c.                                      | Q9LZ88            | 664         | 77-407   |         |
|                                             | Kif34                     | Kinesin heavy chain-like protein                                                    | N-1                                       | Q8LE69            | 469         | 1-346    |         |
|                                             | Kif35                     | T15B3_190                                                                           | N-10                                      | Q9LXV6            | 1229        | 91-498   |         |
|                                             | Kif36                     | F11C1_80                                                                            | N-5                                       | Q9SNE3            | 1075        | 23-388   |         |
|                                             | Kif37                     | F12B17_180 OR GRMP                                                                  | N-14                                      | NP_189907         | 932         | 26-355   |         |
|                                             | Kif38                     | F22M8.8 protein                                                                     | n.c.                                      | Q9LX99            | 1273        | 140-462  |         |
|                                             | Kif39                     | Phragmoplast-associated kinesin-related protein 1                                   | n.c.                                      | Q9LPC6            | 885         | 68-410   |         |
|                                             | Kif40                     | Phragmoplast-associated kinesin-related protein 1                                   | N-10                                      | Q9LDN0            | 1292        | 89-434   |         |
|                                             | Kif41                     | Kinesin-like protein                                                                | n.c.                                      | Q9FZ06            | 919         | 68-420   |         |
|                                             | Kif42                     | T20H2.17 protein                                                                    | N-6                                       | Q9LNT1            | 923         | 74-435   |         |
|                                             | Kif43                     | Similarity to kinesin protein                                                       | M-1                                       | Q9LUS1            | 799         | 211-537  |         |
|                                             | Kif44                     | Kinesin-related centromere protein-like                                             | N-10                                      | Q9LUT5            | 2158        | 166-641  |         |
|                                             | Kif45                     | Kinesin (Centromeric protein)-like protein K13E13.17                                | N-10                                      | Q9LJ60            | 2756        | 191-538  |         |
|                                             | Kif46                     | Similarity to kinesin                                                               | N-10                                      | Q9LJY3            | 1103        | 102-433  |         |
|                                             | Kif47                     | Similarity to kinesin heavy chain                                                   | M-1                                       | Q9LW81            | 706         | 167-488  |         |
|                                             | Kif48                     | AT3g23570/MOB19_16 (Phragmoplast-associated kinesin-related protein 1-like protein) | N-10                                      | Q8LW18            | 1313        | 94-439   |         |
|                                             | Kif49                     | Kinesin heavy chain-like protein                                                    | N-14                                      | Q9FIG8            | 1087        | 7-292    |         |
|                                             | Kif50                     | Similarity to kinesin heavy chain                                                   | n.c.                                      | Q9FKP4            | 1264        | 136-458  |         |
|                                             | Kif51                     | F2516.11 protein                                                                    | N-8                                       | Q9FZ77            | 703         | 149-472  |         |
|                                             | Kif52                     | Kinesin (Centromere protein) like heavy chain-like protein                          | N-7                                       | Q9LHL9            | 1033        | 67-399   |         |
|                                             | Kif53                     | Kinesin-like protein                                                                | N-5                                       | Q9FME7            | 1335        | 4-368    |         |
|                                             | Kif54                     | Kinesin heavy chain DNA binding protein-like                                        | N-14                                      | Q9FH58            | 1037        | 16-350   |         |
|                                             | Kif55                     | Kinesin-like protein                                                                | M-2                                       | Q9FHD2            | 967         | 426-746  |         |
|                                             | Kif56                     | Kinesin heavy chain-like protein                                                    | N-7                                       | Q9FG03            | 997         | 64-406   |         |
|                                             | Kif57                     | Kinesin-like protein                                                                | N-5                                       | Q8GS71            | 1035        | 9-378    |         |
|                                             | Kif58                     | T9N14.6                                                                             | M-2                                       | Q9C7T0            | 1195        | 489-825  |         |
|                                             | Kif59                     |                                                                                     | n.c.                                      | NP_187779         | 665         | 10-303   |         |
|                                             | Kif60                     |                                                                                     | N-17                                      | Q8IWO9            | 625         | 77-410   |         |
|                                             | Kif61                     | AT5g27950/F15F15_20                                                                 | M-2                                       | NP_198107         | 425         | 37-371   |         |
|                                             | Kif62                     | probable kinesin heavy chain                                                        | N-7                                       | E84600            | 857         | 9-326    |         |
| Ashbya gossypii (Eremothecium gossypii)     | Kin8                      |                                                                                     | N-2                                       | Q8J1G7            | 845         | 20-417   |         |
|                                             | Kip1                      |                                                                                     | N-2                                       | Q8J1G4            | 1129        | 52-425   |         |
|                                             | Kip2                      |                                                                                     | N-13                                      | Q8J1G1            | 685         | 111-454  |         |
| Bombyx mori (Silk moth)                     | Klp2                      | Kinesin-like protein KLP2 (Fragment)                                                | N-2                                       | P46874            | 378         | 11-362   |         |
| Brachydanio rerio (Zebrafish) (Danio rerio) | Kif1B                     | Kinesin-like protein Kif1b alpha                                                    | N-3                                       | Q8JIX1            | 1161        | 3-355    |         |
|                                             | Kif4A                     | Similar to kinesin family member 4A (Fragment)                                      | N-5                                       | AAH46903          | 695         | 8-346    |         |
|                                             | Kif18                     | Danio rerio, Similar to hypothetical protein DKFZp434G2226, clone MGC:55995         | N-8                                       | BC047799          | 895         | 7-361    |         |
|                                             | Kip2                      | Slit244019.6.2 (kinesin-like protein 2)                                             | C-1                                       | CA060638          | 618         | 271-416  |         |
|                                             | Klp5                      | Mitotic kinesin-like protein 1 KNLSL5 OR ZMKLP1                                     | N-6                                       | Q9PUL5            | 867         | 23-444   |         |
| Branchiostoma belcheri (Amphioxus)          | Kif1                      | KIF1-like protein (Fragment)                                                        | N-3                                       | Q8I6M0            | 267         | 1-267    |         |
| Caenorhabditis elegans                      | Klp1                      | Kinesin-like protein unc-104 or C5E12.2                                             | N-3                                       | P23678            | 1584        | 1-355    |         |
|                                             | Klp2                      | OSM-3 protein (corresponding sequence M02B7.3b)                                     | N-4                                       | Q8MPT8            | 699         | 2-335    |         |
|                                             | Klp3                      | KLP-3 OR T09A5.2                                                                    | n.c.                                      | P45962            | 589         | 243-673  |         |
|                                             | Klp4                      | KLP-4 protein (corresponding sequence F56E3.3b)                                     | N-3                                       | Q8MQ20            | 1610        | 7-389    |         |
|                                             | Klp5                      |                                                                                     | N-11                                      | CAD36504          | 1066        | 13-311   |         |
|                                             | Klp6                      | Putative kinesin-like protein R144.1 in chromosome III                              | N-3                                       | Q09997            | 928         | 4-366    |         |
|                                             | Klp7                      | KLP-7                                                                               | M-1                                       | Q8MY85            | 747         | 318-659  |         |
|                                             | Klp9                      | M03D4.1 OR ZEN-4                                                                    | N-6                                       | Q8MQ04            | 777         | 25-436   |         |
|                                             | Klp10                     | C33H5.4 OR KLP-10                                                                   | N-10                                      | I18413            | 690         | 2-335    |         |
|                                             | Klp11                     | F20C5.2b protein                                                                    | N-4                                       | Q8MQ68            | 1130        | 11-337   |         |
|                                             | Klp12                     | T01G1.1 protein                                                                     | N-5                                       | O17887            | 1609        | 7-654    |         |
|                                             | Klp13                     | F22F4.3 protein                                                                     | N-3                                       | Q17545            | 595         | 5-246    |         |
|                                             | Klp14                     | F23B12.8 protein (BIMC kinesin BMK-1) (Kinesin like protein KLP-14)                 | N-2                                       | Q9XTM0            | 958         | 11-353   |         |
|                                             | Klp15                     | Kinesin like protein-15                                                             | n.c.                                      | Q9NLA1            | 587         | 246-574  |         |
|                                             | Klp16                     | KLP-16 OR C41G7.2                                                                   | n.c.                                      | Q93366            | 587         | 246-574  |         |
|                                             | Klp17                     | Kinesin like protein                                                                | n.c.                                      | Q9NLS1            | 605         | 277-600  |         |
|                                             | Klp18                     | Hypothetical 105.8 kDa protein C06G3.2                                              | N-10                                      | Q17753            | 932         | 2-338    |         |
|                                             | Klp19                     | Y43F4B.6 protein                                                                    | N-5                                       | O45935            | 1083        | 4-336    |         |
|                                             | Klp20                     | Hypothetical protein Y50D7A.6                                                       | N-4                                       | Q965T6            | 646         | 4-339    |         |
|                                             | Khc                       | UNC-116 OR R05D3.7                                                                  | N-1                                       | P34540            | 815         | 9-337    |         |
|                                             | Candida albicans (Yeast)  | Kar3                                                                                |                                           | C-1               | Q8J0M3      | 687      | 345-687 |
|                                             |                           | Kip2                                                                                | CA38F10.07                                | N-13              | O94053      | 665      | 74-411  |
|                                             | Chlamydomonas reinhardtii | FLA10                                                                               | Kinesin-like protein FLA10 (KHP1 protein) | N-4               | P46869      | 798      | 8-361   |
| Klp1                                        |                           | Kinesin-like protein KLP1                                                           | N-12                                      | P46870            | 776         | 3-343    |         |

|                                          |                                             |                                                                                                       |                                 |            |        |         |         |
|------------------------------------------|---------------------------------------------|-------------------------------------------------------------------------------------------------------|---------------------------------|------------|--------|---------|---------|
| Cricetulus griseus (Chinese hamster)     | Kif1                                        | CHO1 antigen                                                                                          | N-6                             | Q60442     | 953    | 23-444  |         |
|                                          | Kif2                                        | CHO2 antigen                                                                                          | C-1                             | Q60443     | 622    | 288-620 |         |
|                                          | Kif2C                                       | Mitotic centromere-associated kinesin (MCAK) (Kinesin-like protein 6)                                 | M-1                             | P70096     | 718    | 250-588 |         |
| Cyanophora paradoxa                      | Kif1                                        | Motor protein (Fragment)                                                                              | n.c.                            | Q9FQL8     | 158    | 1-158   |         |
| Cylindrotheca fusiformis (Marine diatom) | Sk1                                         | Diatom spindle kinesin 1                                                                              | M-1                             | Q39493     | 624    | 93-419  |         |
| Daucus carota (Carrot)                   | Krp120B                                     | KRP120-2                                                                                              | N-2                             | Q94G20     | 1045   | 50-402  |         |
| Dictyostelium discoideum                 | Kif1                                        | Kinesin Unc104/KIF1a homolog                                                                          | N-3                             | Q9NGQ2     | 2205   | 2-363   |         |
|                                          | Kif2                                        | Dd kinesin-related protein K2                                                                         | C-1                             | Q9BPU3     | 792    | 435-789 |         |
|                                          | Kif3                                        | Kinesin-related protein K4                                                                            | N-1                             | Q8I825     | 1193   | 1-337   |         |
|                                          | Kif4                                        |                                                                                                       | N-7                             | BAC56912   | 1922   | 20-351  |         |
|                                          | Kif5                                        |                                                                                                       | N-1                             |            |        | 4-338   |         |
|                                          | Kif6                                        |                                                                                                       | M-1                             | Q94499     | 1030   | 451-783 |         |
|                                          | Kif7                                        |                                                                                                       | N-1                             |            | 1254   | 26-356  |         |
|                                          | Kif8                                        |                                                                                                       | N-5                             | Q94500     | 1873   | 11-421  |         |
|                                          | Kif9                                        |                                                                                                       | n.c.                            | BAC56911   | 1222   | 349-727 |         |
|                                          | Kif10                                       |                                                                                                       | N-8                             |            | 1238   | 14-382  |         |
|                                          | Kif11                                       |                                                                                                       | N-7                             |            | 685    | 2-413   |         |
|                                          | Kif12                                       |                                                                                                       | N-6                             |            | 1499   | 124-578 |         |
|                                          | Kif13                                       | N-2                                                                                                   |                                 | 1265       | 21-356 |         |         |
| Drosophila melanogaster (Fruit fly)      | Unc104                                      | Kinesin superfamily member DUnc104 OR CG8566                                                          | N-3                             | Q9NBL1     | 1671   | 1-360   |         |
|                                          | Khc                                         |                                                                                                       | N-1                             | P17210     | 975    | 51-334  |         |
|                                          | Kin73                                       | KHC-73 OR CG8183                                                                                      | N-3                             | Q01349     | 1921   | 3-360   |         |
|                                          | Kif3C                                       | KIF3C OR CG17459 OR CG17461                                                                           | N-4                             | Q9V4A1     | 579    | 2-352   |         |
|                                          | Kif19A                                      | KIF19A OR CG9913                                                                                      | N-8                             | Q9VFN0     | 728    | 33-357  |         |
|                                          | Klp3A                                       | KLP3A OR BC0NALD21815 OR EG-BACR25B3.9 OR CG8590                                                      | N-5                             | Q9XZ29     | 1212   | 6-343   |         |
|                                          | Klp10A                                      | KLP10A OR CG1453                                                                                      | N-1                             | Q96020     | 805    | 276-418 |         |
|                                          | Klp31E                                      | KLP31E OR CG5300                                                                                      | N-5                             | Q9VKW4     | 1048   | 11-371  |         |
|                                          | Klp38B                                      | NEB OR KLP38B OR CG10718                                                                              | N-3                             | I16866     | 1121   | 118-526 |         |
|                                          | Klp54D                                      | KLP54D OR CG15844                                                                                     | N-9                             | Q9V842     | 844    | 166-524 |         |
|                                          | Klp9C                                       | KLP59C OR CG3219                                                                                      | M-1                             | Q9W1U4     | 626    | 185-529 |         |
|                                          | Klp61F                                      | Bipolar kinesin KRP-130 (Kinesin-like protein Klp61F) KLP61F OR KLP2 OR CG9191                        | N-2                             | P46863     | 1066   | 17-364  |         |
|                                          | Klp64D                                      | KLP64D OR CG10642                                                                                     | N-4                             | Q9VRK9     | 677    | 18-360  |         |
|                                          | Klp67A                                      | KLP67A OR CG10923                                                                                     | N-6                             | Q9VSW5     | 814    | 6-354   |         |
|                                          | Klp68D                                      | KLP68D OR KLP5 OR CG7293                                                                              | N-4                             | P46867     | 784    | 17-352  |         |
|                                          | Klp98A                                      | KLP98A OR CG5658                                                                                      | N-3                             | Q8S2H6     | 1299   | 1-372   |         |
|                                          | CANA                                        | CANA OR CG4831                                                                                        | N-7                             | Q9NCF9     | 1931   | 6-318   |         |
|                                          | CMET                                        | Kinesin-like kinetochore motor protein CENP-meta CMET OR CG6392                                       | N-7                             | Q9NCG0     | 2244   | 6-329   |         |
|                                          | COS                                         | COS OR CG1708                                                                                         | n.c.                            | Q9V4K0     | 1201   | 2-399   |         |
|                                          | NCD                                         | NCD OR CA(ND) OR CG7831                                                                               | C-1                             | P20480     | 700    | 346-678 |         |
|                                          | NOD                                         | NOD OR NODA OR CG1763                                                                                 | n.c.                            | P18105     | 666    | 6-328   |         |
|                                          | PAV                                         | PAV OR CG1258                                                                                         | N-6                             | Q8SXT9     | 887    | 34-460  |         |
|                                          | SUB                                         | SUB OR CG12298                                                                                        | n.c.                            | Q9V877     | 628    | 85-487  |         |
|                                          | CG12192                                     | CG12192 protein                                                                                       | M-1                             | Q9W1U1     | 729    | 231-873 |         |
|                                          | Emmericella nidulans (Aspergillus nidulans) | KinA                                                                                                  | Kinesin (KINA protein)          | N-1        | Q9HES9 | 927     | 9-342   |
|                                          |                                             | BimC                                                                                                  | Kinesin-like protein BIMC       | N-2        | P17120 | 1184    | 79-424  |
|                                          |                                             | KlpA                                                                                                  | Kinesin-like protein KLP A      | C-1        | P28739 | 770     | 419-764 |
|                                          | Encephalitozoon cuniculi                    | Kif1                                                                                                  | ECU05_0060                      | N-5        | Q8SS10 | 818     | 5-307   |
|                                          |                                             | Kif2                                                                                                  | ECU08_0890                      | N-10       | Q8SRB7 | 420     | 2-306   |
|                                          |                                             | Kif3                                                                                                  | Hypothetical protein ECU10_0320 | C-1        | Q8SLH1 | 495     | 166-488 |
|                                          |                                             | Kif4                                                                                                  | ECU10_1000                      | n.c.       | Q8S355 | 474     | 22-318  |
|                                          |                                             | Kif5                                                                                                  | ECU11_0470                      | M-1        | Q8SQY6 | 581     | 172-489 |
| Kif6                                     |                                             | ECU11_2020                                                                                            | N-16                            | Q8SQQ9     | 548    | 3-299   |         |
| Ephydatia fluviatilis                    | Kif1                                        | KIF1-like protein (Fragment)                                                                          | N-3                             | Q8I6M4     | 257    | 1-257   |         |
|                                          | Kif2                                        |                                                                                                       | N-3                             | Q8I6M3     | 255    | 1-247   |         |
| Eptatretus burgeri (Inshore hagfish)     | Kif1A                                       | KIF1-like protein A (Fragment)                                                                        | N-3                             | Q8I6M2     | 258    | 1-258   |         |
|                                          | Kif1B                                       |                                                                                                       | N-3                             | Q8I6M1     | 256    | 1-256   |         |
| Gallus gallus (Chicken)                  | Kif4A                                       | Chromosome-associated kinesin KIF4A (Chromokinesin)                                                   | N-5                             | Q90640     | 1225   | 8-346   |         |
| Giardia lamblia (Giardia intestinalis)   | Klp1                                        | Kinesin-like protein 1 (Fragment)                                                                     | n.c.                            | Q96900     | 662    | 1-263   |         |
|                                          | Klp2                                        | Kinesin-like protein 2 (Fragment)                                                                     | N-4                             | Q969C9     | 619    | 1-244   |         |
|                                          | Klp3                                        | Kinesin-like protein 3 (Fragment)                                                                     | N-4                             | Q969C7     | 529    | 1-239   |         |
|                                          | Klp4                                        | Kinesin-like protein 4 (Fragment)                                                                     | N-5                             | Q969C6     | 970    | 1-280   |         |
|                                          | Klp5                                        | Kinesin-like protein 5 (Fragment)                                                                     | n.c.                            | Q969C4     | 679    | 1-250   |         |
|                                          | Klp6                                        | Kinesin-like protein 6 (Fragment)                                                                     | N-3                             | Q969C2     | 976    | 1-269   |         |
|                                          | Klp7                                        | Kinesin-like protein 7 (Fragment)                                                                     | N-1                             | Q969C1     | 870    | 1-280   |         |
|                                          | Klp8                                        | Kinesin-like protein 8 (Fragment)                                                                     | n.c.                            | Q969C0     | 264    | 1-264   |         |
|                                          | Klp9                                        | Kinesin-like protein 9 (Fragment)                                                                     | N-12                            | Q969B8     | 655    | 1-255   |         |
|                                          | Klp10                                       | Kinesin-like protein 10 (Fragment)                                                                    | n.c.                            | Q969B6     | 739    | 1-289   |         |
|                                          | Klp11                                       | Kinesin-like protein 11 (Fragment)                                                                    | N-2                             | Q969B4     | 958    | 1-301   |         |
|                                          | Klp12                                       | Kinesin-like protein 12 (Fragment)                                                                    | n.c.                            | Q969B2     | 824    | 21-311  |         |
|                                          | Klp13                                       | Kinesin-like protein 13 (Fragment)                                                                    | M-1                             | Q969B0     | 439    | 1-248   |         |
| Homo sapiens (Human)                     | Kif1A                                       | KIAA1448                                                                                              | N-3                             | NP_004312  | 1690   | 3-362   |         |
|                                          | Kif1B                                       |                                                                                                       | N-3                             | Q9P280     | 1179   | 3-362   |         |
|                                          | Kif1C                                       | Kinesin-like protein KIF1C                                                                            | N-3                             | Q43896     | 1103   | 3-356   |         |
|                                          | Kif2A                                       | Kinesin-like protein KIF2 (Kinesin-2) (HK2)                                                           | M-1                             | Q00139     | 679    | 194-534 |         |
|                                          | Kif2B                                       | Kinesin                                                                                               | M-1                             | Q9BX66     | 673    | 211-549 |         |
|                                          | Kif2C                                       | Mitotic centromere-associated kinesin (MCAK) (Kinesin-like protein 6)                                 | M-1                             | Q99661     | 725    | 256-594 |         |
|                                          | Kif3A                                       | Kinesin-like protein KIF3A (Microtubule plus end-directed kinesin motor 3A)                           | N-4                             | Q9Y496     | 702    | 12-353  |         |
|                                          | Kif3B                                       | Kinesin-like protein KIF3B (Microtubule plus end-directed kinesin motor 3B) (HH0048)                  | N-4                             | O15066     | 747    | 7-348   |         |
|                                          | Kif3C                                       |                                                                                                       | N-4                             | NP_0022245 | 793    | 8-373   |         |
|                                          | Kif4A                                       | Chromosome-associated kinesin KIF4A (Chromokinesin)                                                   | N-5                             | O95239     | 1232   | 7-344   |         |
|                                          | Kif5A                                       | Neuronal kinesin heavy chain (NKHC) (Kinesin heavy chain isoform 5A)                                  | N-1                             | Q12840     | 1032   | 7-335   |         |
|                                          | Kif5B                                       | Kinesin heavy chain (Ubiquitous kinesin heavy chain) (LKHC)                                           | N-1                             | P33176     | 963    | 6-333   |         |
|                                          | Kif5C                                       | Kinesin family member 5C, Kinesin, heavy chain, neuron-specific                                       | N-1                             | NP_004513  | 957    | 6-335   |         |
|                                          | Kif6                                        | Homo sapiens kinesin protein 9 gene, complete cds                                                     | N-12                            | AF311212_1 | 725    | 4-348   |         |
|                                          | Kif10                                       | Centromeric protein E (CENP-E protein)                                                                | N-7                             | Q02224     | 2663   | 4-337   |         |
|                                          | Kif11                                       | Kinesin-related motor protein Eg5 (Kinesin-like spindle protein HKSP) (TRIP5) (Kinesin-like protein1) | N-2                             | P52732     | 1057   | 16-367  |         |
|                                          | Kif12                                       | Hypothetical protein                                                                                  | N-9                             | Q96FN5     | 513    | 3-235   |         |
|                                          | Kif13A                                      |                                                                                                       | N-3                             | Q9H1H9     | 1805   | 3-360   |         |
|                                          | Kif13B                                      | Kinesin-like protein KIF13B (Kinesin-like protein GAKIN) KIF13B OR GAKIN OR KIAA0639                  | N-3                             | Q9NQT8     | 1826   | 3-361   |         |
|                                          | Kif14                                       | Kinesin-like protein KIF14 OR KIAA0042                                                                | N-3                             | Q15058     | 1648   | 356-709 |         |
|                                          | Kif15                                       | Kinesin-like protein 2                                                                                | N-10                            | Q9NS87     | 1388   | 24-371  |         |
|                                          | Kif16A                                      |                                                                                                       | N-3                             | AA017292   | 1317   | 1-366   |         |
|                                          | Kif17                                       | KIAA1405 protein (Fragment)                                                                           | N-4                             | BAA92643   | 993    | 6-307   |         |
|                                          | Kif18A                                      | OK/SW-CL108                                                                                           | N-8                             | Q8NI77     | 898    | 9-363   |         |

|                                                               |        |                                                                                 |      |            |      |         |
|---------------------------------------------------------------|--------|---------------------------------------------------------------------------------|------|------------|------|---------|
|                                                               | KIF19A | Hypothetical protein FLJ37300                                                   | N-8  | Q8N1X8     | 548  | 9-354   |
|                                                               | KIF20A | Rabkinesin-6 (RAB6-interacting kinesin-like protein) (GG10_2)                   | N-6  | Q95235     | 890  | 62-515  |
|                                                               | KIF20B | DKFZP434B0435                                                                   | N-6  | Q9URF5     | 1730 | 56-486  |
|                                                               | KIF21A | NY-REN-62 antigen (Fragment)                                                    | N-4  | Q9Y590     | 680  | 55-428  |
|                                                               | KIF22  | Kinesin-like DNA-binding protein (Kinesin-like protein 4)                       | N-16 | Q14807     | 665  | 41-376  |
|                                                               | KIF23  | Kinesin-like 5 (Mitotic kinesin-like protein 1)                                 | N-6  | Q8WVPO     | 960  | 23-454  |
|                                                               | KIF25  | Kinesin-like protein 3                                                          | n.c. | Q9ULI4     | 384  | 4-371   |
|                                                               | KIF26A | KIAA1236 protein (Fragment)                                                     | N-11 | Q9ULI4     | 1840 | 327-691 |
|                                                               | KIF26B | Similar to kinesin-like protein at 64D (Fragment)                               | N-11 | Q8LUN3     | 820  | 66-426  |
|                                                               | KIFC1  | Kinesin-like protein 2 (Kinesin-related protein HSET)                           | C-1  | Q9BW19     | 673  | 308-671 |
|                                                               | KIFC2  | Similar to kinesin family member C2                                             | C-2  | Q95AC6     | 838  | 470-725 |
|                                                               | KIFC3  | Kinesin family member C3                                                        | C-3  | Q9BVG8     | 694  | 304-637 |
| Leishmania chagasi                                            | K39    | Kinesin-like protein K39 (Fragment)                                             | N-3  | P46865     | 955  | 10-400  |
| Leishmania major                                              | KIF1   | L374.01                                                                         | N-3  | Q9U179     | 1128 | 80-559  |
|                                                               | KIF2   | L2230.03                                                                        | n.c. | Q9BLV2     | 1315 | 59-592  |
|                                                               | KIF3   | L2802.10                                                                        | M-1  | Q9N9P0     | 729  | 32-361  |
|                                                               | KIF4   | L3537.05                                                                        | M-1  | Q9GYC7     | 728  | 195-625 |
|                                                               | KIF5   | L3747.08                                                                        | N-12 | Q95ZA4     | 1227 | 7-459   |
|                                                               | KIF6   | L3856.08                                                                        | n.c. | Q9GYC1     | 2121 | 13-476  |
|                                                               | KIF7   | L4520.01                                                                        | N-3  | Q9U142     | 1099 | 79-567  |
|                                                               | KIF8   | L4520.02                                                                        | N-3  | Q9U141     | 2273 | 29-551  |
|                                                               | KIF9   | L6066.08                                                                        | C-3  | Q9NEA9     | 829  | 499-829 |
|                                                               | KIF10  | L6586.07                                                                        | n.c. | Q9NF78     | 656  | 1-388   |
|                                                               | KIF11  | L8325.12                                                                        | N-10 | Q9NEB6     | 1254 | 99-811  |
|                                                               | KIF12  | L8530.03                                                                        | n.c. | Q9GNR3     | 956  | 2-310   |
|                                                               | KIF13  | MCAK                                                                            | M-1  | Q60964     | 668  | 132-461 |
| Lethenteron reissneri                                         | KIF1A  | KIF1-like protein A (Fragment)                                                  | N-3  | Q8AV75     | 258  | 1-250   |
|                                                               | KIF1B  | KIF1-like protein B (Fragment)                                                  | N-3  | Q8AV74     | 264  | 1-256   |
| Loligo pealeii (Longfin squid)                                | Kif1   | Kinesin heavy chain                                                             | N-1  | P21613     | 967  | 6-334   |
| Lycopersicon esculentum (Tomato)                              | Kif1   | Kinesin related protein                                                         | N-10 | Q8GZU1     | 1191 | 94-440  |
|                                                               | Kif2   | TH65-like protein (Fragment)                                                    | n.c. | Q949J3     | 604  | 225-487 |
| Lymantria dispar (Gypsy moth)                                 | Klp1   | Kinesin-like protein Ldklp1 (Fragment)                                          | C-1  | Q9BMB7     | 143  | 1-143   |
|                                                               | Klp2   | Kinesin-like protein Ldklp1 (Fragment)                                          | n.c. | Q9BMB8     | 354  | 103-354 |
| Macaca fascicularis (Crab eating macaque) (Cynomolgus monkey) | Kif1   | Hypothetical 98.5 kDa protein (Fragment)                                        | N-15 | Q95LL1     | 865  | 3-349   |
|                                                               | Kif2   | Hypothetical 35.5 kDa protein                                                   | N-1  | Q9GMV1     | 317  | 1-230   |
|                                                               | Kif3   | Hypothetical 75.6 kDa protein (Kinensin)                                        | M-1  | Q95LT1     | 670  | 208-646 |
| Monodelphis domestica (Short-tailed grey opossum)             | Kif1   | Kinesin homolog (Fragment)                                                      | N-14 | O19017     | 133  |         |
| Morone saxatilis (Striped bass)                               | KF1    |                                                                                 | N-1  | AAA85772   | 145  |         |
|                                                               | KF2    | Microtubule-based motor protein                                                 | C-3  | P79805     | 773  | 369-704 |
|                                                               | KF3    | KIF3 (Fragment)                                                                 | N-3  | Q91112     | 151  |         |
|                                                               | KF4    | KIF4 (Fragment)                                                                 | M-1  | Q91113     | 146  |         |
|                                                               | KF5    | KIF5 (Fragment)                                                                 | N-1  | Q91114     | 145  |         |
|                                                               | KF6    | KIF6 (Fragment)                                                                 | N-16 | Q91115     | 145  |         |
|                                                               | KF8    | KIF8 (Fragment)                                                                 | N-3  | Q91116     | 151  |         |
|                                                               | KF9    | KIF9 (Fragment)                                                                 | N-1  | Q91117     | 145  |         |
| Mus musculus (Mouse)                                          | KIF1A  | Kinesin-like protein KIF1A (Axonal transporter of synaptic vesicles)            | N-3  | P33173     | 1695 | 3-362   |
|                                                               | KIF1B  | AX641842_1                                                                      | N-3  | AX641842_1 | 1770 | 3-356   |
|                                                               | KIF1C  | Kinesin superfamily protein 1C                                                  | N-3  | Q8V189     | 1100 | 3-356   |
|                                                               | KIF2A  | Kinesin-like protein KIF2                                                       | M-1  | P28740     | 716  | 193-533 |
|                                                               | KIF2B  | Kinesin superfamily protein 2B                                                  | M-1  | Q8CON1     | 668  | 211-649 |
|                                                               | KIF2C  | Kinesin-like protein KIF2C (Mitotic centromere-associated kinesin)              | M-1  | Q92258     | 721  | 252-680 |
|                                                               | KIF3A  | kinesin family member 3A; kinesin-II subunit; N-4 kinesin                       | N-4  | NP_032469  | 701  | 12-363  |
|                                                               | KIF3B  | kinesin family member 3B; expressed sequence A1854312                           | N-4  | NP_032470  | 747  | 7-348   |
|                                                               | KIF3C  | kinesin family member 3C; N-4 kinesin                                           | N-4  | NP_032471  | 796  | 8-375   |
|                                                               | KIF4A  | Chromosome-associated kinesin KIF4A (Chromokinesin)                             | N-5  | P33174     | 1231 | 7-345   |
|                                                               | KIF5A  | kinesin family member 5A                                                        | N-1  | NP_032473  | 1027 | 7-335   |
|                                                               | KIF5B  | kinesin family member 5B;                                                       | N-1  | NP_032474  | 963  | 6-333   |
|                                                               | KIF5C  | kinesin family member 5C                                                        | N-1  | NP_032475  | 956  | 6-335   |
|                                                               | KIF6   | Motor domain of KIF6 (Fragment)                                                 | N-12 | Q35067     | 165  |         |
|                                                               | KIF7   | Motor domain of KIF7 (Fragment)                                                 | N-15 | Q35068     | 168  |         |
|                                                               | KIF8   | motor domain of KIF8                                                            | N-2  | BAA22396   | 185  |         |
|                                                               | KIF9   | Kinesin superfamily protein 9                                                   | N-12 | Q8BU81     | 711  | 4-348   |
|                                                               | KIF10  | Motor domain of KIF10 (Fragment)                                                | N-7  | Q35059     | 160  |         |
|                                                               | KIF11  | KNSL1 OR KIFL1 OR EGS                                                           | N-2  | Q91130     | 1014 | 7-328   |
|                                                               | KIF12  | Kinesin 12                                                                      | N-9  | Q9D228     | 642  | 23-368  |
|                                                               | KIF13A | Kinesin-like protein KIF13A                                                     | N-3  | Q9EQW7     | 1749 | 3-360   |
|                                                               | KIF13B | motor domain of KIF13B                                                          | N-3  | BAA22390   | 160  |         |
|                                                               | KIF14  | Motor domain of KIF14 (Fragment)                                                | N-3  | Q35064     | 166  |         |
|                                                               | KIF15  | Motor domain of KIF15 (Fragment)                                                | N-10 | Q35065     | 166  |         |
|                                                               | KIF16A | Kinesin superfamily protein 16A (Fragment)                                      | N-3  | Q8BZ29     | 788  | 1-172   |
|                                                               | KIF16B | Motor domain of KIF16A (Fragment)                                               | N-3  | Q35058     | 160  |         |
|                                                               | KIF17  | Kinesin-like protein KIF17 (Mmkf17)                                             | N-4  | Q99PW8     | 1038 | 3-343   |
|                                                               | KIF18A | Similar to hypothetical protein DKFZp434G2226                                   | N-8  | Q91W07     | 885  | 9-363   |
|                                                               | KIF18B | Kinesin superfamily protein 18B (Fragment)                                      | N-8  | Q99PU0     | 149  | 1-149   |
|                                                               | KIF19A | kinesin superfamily protein 19A                                                 | N-8  | BAB32490   | 148  | 1-148   |
|                                                               | KIF20A | Rabkinesin-6 (RAB6-interacting kinesin-like protein) (Kinesin-like protein 174) | N-6  | P97329     | 887  | 61-514  |
|                                                               | KIF20B | Kinesin superfamily protein 20B (Fragment)                                      | N-6  | Q8BLI2     | 692  | 56-463  |
|                                                               | KIF21A | Kif21a                                                                          | N-5  | Q9QXL2     | 1573 | 7-379   |
|                                                               | KIF21B | Kif21b                                                                          | N-5  | Q9QXL1     | 1668 | 6-379   |
|                                                               | KIF22  | KIF22B OR AL033313                                                              | N-16 | Q99LC7     | 660  | 36-371  |
|                                                               | KIF23  | clone:3110001.D19 product:kinesin-like 5                                        | N-6  | Q9CXV7     | 495  | 61-470  |
|                                                               | KIF24  | Kinesin superfamily protein KIF24                                               | M-1  | Q8BU82     | 862  | 216-413 |
|                                                               | KIF26A | kinesin superfamily protein 26A                                                 | N-11 | BAB32495   | 147  |         |
|                                                               | KIF26B | kinesin superfamily protein 26B                                                 | N-11 | BAB32487   | 130  |         |
|                                                               | KIFC1  | Similar to kinesin family member C1                                             | C-1  | Q99LS4     | 674  | 399-672 |
|                                                               | KIFC2  | KIFC2                                                                           | C-2  | Q98672     | 792  | 407-740 |
|                                                               | KIFC3  | Kinesin motor protein KIFC3                                                     | C-3  | Q35231     | 709  | 326-659 |
| Nectria haematococca                                          | Kin1   |                                                                                 | N-1  | P78718     | 929  | 4-337   |
|                                                               | Krp1   | Kinesin related protein 1                                                       | C-1  | Q93928     | 902  | 463-902 |
|                                                               | Krp2   | Kinesin related protein 2                                                       | N-2  | Q93929     | 1024 | 1-279   |
| Neurospora crassa                                             | Kin    | Kinesin heavy chain                                                             | N-1  | P48467     | 928  | 5-338   |
|                                                               | KIF1C  | Related to kinesin-like protein KIF1C 17E5.250                                  | N-3  | Q9C2M3     | 676  | 66-450  |
|                                                               | Kif4   | B14D6.010                                                                       | n.c. | Q8XOC5     | 1968 | 52-451  |
|                                                               |        | kinesin-like protein Kif21a related protein                                     | N-1  | T49451     | 1742 |         |

|                                                   |                                                  |                                                                                   |                                                              |                                                      |                                 |                                                    |           |          |         |        |
|---------------------------------------------------|--------------------------------------------------|-----------------------------------------------------------------------------------|--------------------------------------------------------------|------------------------------------------------------|---------------------------------|----------------------------------------------------|-----------|----------|---------|--------|
| Nicotiana tabacum (Common tobacco)                | Krp125                                           | 125 kDa kinesin-related protein                                                   | N-2                                                          | Q23826                                               | 1006                            | 7-363                                              |           |          |         |        |
|                                                   | Tck1                                             | Kinesin-like protein                                                              | C-4                                                          | Q24147                                               | 1265                            | 887-1218                                           |           |          |         |        |
|                                                   | Nack1                                            | Kinesin-like protein NACK1                                                        | N-14                                                         | Q85950                                               | 959                             | 28-361                                             |           |          |         |        |
|                                                   | Nack2                                            | Kinesin-like protein NACK2                                                        | N-14                                                         | Q85949                                               | 955                             | 34-369                                             |           |          |         |        |
|                                                   | Tks5                                             | BY-2 kinesin-like protein 5                                                       | N-17                                                         | Q9AVD5                                               | 633                             | 95-425                                             |           |          |         |        |
|                                                   | Klp1                                             | Kinesin-like polypeptides 1 (Fragment)                                            | M-2                                                          | Q9AVD9                                               | 157                             |                                                    |           |          |         |        |
|                                                   | Klp2                                             | Kinesin-like polypeptides 2 (Fragment)                                            | M-2                                                          | Q9AVD8                                               | 158                             |                                                    |           |          |         |        |
|                                                   | Klp3                                             | Kinesin-like polypeptides 3 (Fragment)                                            | C-1                                                          | Q9AVD7                                               | 170                             |                                                    |           |          |         |        |
|                                                   | Klp4                                             | Kinesin-like polypeptides 4 (Fragment)                                            | N-14                                                         | Q9AVD6                                               | 150                             |                                                    |           |          |         |        |
|                                                   | Klp6                                             | Kinesin-like polypeptides 6 (Fragment)                                            | N-2                                                          | Q9AVD5                                               | 172                             |                                                    |           |          |         |        |
|                                                   | Klp7                                             | Kinesin-like polypeptides 7 (Fragment)                                            | N-10                                                         | Q9AVD4                                               | 167                             |                                                    |           |          |         |        |
| Oikopleura dioica                                 | Klp8                                             | Kinesin-like polypeptides 8 (Fragment)                                            | N-10                                                         | Q9AVD3                                               | 167                             |                                                    |           |          |         |        |
|                                                   | Klp9                                             | Kinesin-like polypeptides 9 (Fragment)                                            | N-2                                                          | Q9AVD2                                               | 157                             |                                                    |           |          |         |        |
|                                                   | Klp10                                            | BY-2 kinesin-like protein 10                                                      | M-1                                                          | Q9AVP4                                               | 703                             | 185-516                                            |           |          |         |        |
|                                                   | Klp11                                            | Kinesin-like polypeptides 11 (Fragment)                                           | M-2                                                          | Q9AVD1                                               | 157                             |                                                    |           |          |         |        |
|                                                   | KR1                                              | Similar to M-phase phosphoprotein BAC001.20                                       | n.c.                                                         | Q8WPL4                                               | 1203                            | 19-462                                             |           |          |         |        |
|                                                   | Oryza sativa (japonica cultivar-group)           | Kif1                                                                              | P0617C02.15 OR P0446F04.41                                   | C-1                                                  | Q8L491                          | 733                                                | 383-724   |          |         |        |
|                                                   |                                                  | Kif2                                                                              | QJ1340_COB.3                                                 | N-10                                                 | Q8GVH3                          | 1967                                               | 137-484   |          |         |        |
|                                                   |                                                  | Kif3                                                                              | Similar to Arabidopsis thaliana chromosome 1 BAC clone T5A14 | N-17                                                 | Q9L654                          | 801                                                | 101-433   |          |         |        |
|                                                   |                                                  | Kif4                                                                              | OSJNBA0033P04.11                                             | C-1                                                  | Q85606                          | 642                                                | 294-633   |          |         |        |
|                                                   |                                                  | Kif5                                                                              | P0504D03.21                                                  | N-14                                                 | Q9AWM8                          | 954                                                | 32-362    |          |         |        |
|                                                   |                                                  | Kif6                                                                              | Phragmoplast-associated kinesin-related protein 1 (Fragment) | N-10                                                 | Q9LLF1                          | 817                                                | 1-152     |          |         |        |
| Kif7                                              |                                                  | OSJNBA0090010.9                                                                   | M-2                                                          | Q8GZK4                                               | 1045                            | 405-721                                            |           |          |         |        |
| Kif8                                              |                                                  | Putative kinesin-related protein KLP4                                             | M-2                                                          | Q8SP21                                               | 866                             | 539-840                                            |           |          |         |        |
| Kif9                                              |                                                  | P0439E07.25 OR OSJNBA0014K08.4                                                    | M-2                                                          | Q8L4J3                                               | 810                             | 377-653                                            |           |          |         |        |
| Kif10                                             |                                                  | P0681B11.29 protein                                                               | N-8                                                          | Q8WOK4                                               | 773                             | 203-537                                            |           |          |         |        |
| Kif11                                             |                                                  | P0006C01.8                                                                        | M-1                                                          | Q9FPA5                                               | 707                             | 150-483                                            |           |          |         |        |
| Oryzias latipes (Medaka fish) (Japanese ricefish) | Kif12                                            | OSJNBA0026L1.2.18                                                                 | N-7                                                          | Q9FW70                                               | 859                             | 1-236                                              |           |          |         |        |
|                                                   | Kif13                                            | Kinesin-like protein                                                              | M-1                                                          | Q94GW1                                               | 800                             | 197-522                                            |           |          |         |        |
|                                                   | Klp2                                             | KNSL2 protein                                                                     | C-1                                                          | Q8UUL1                                               | 678                             | 333-676                                            |           |          |         |        |
|                                                   | Paracentrotus lividus (Common sea urchin)        | Boursin                                                                           | Kinesin-like boursin                                         | N-2                                                  | Q9GNU2                          | 1081                                               | 10-359    |          |         |        |
|                                                   |                                                  | Plasmodium falciparum                                                             | Kif1                                                         | PFA0535C                                             | N-8                             | Q8I235                                             | 1669      | 924-1273 |         |        |
|                                                   |                                                  |                                                                                   | Kif2                                                         | PFC0770C_MAL3P6.13                                   | N-2                             | Q77382                                             | 1619      | 16-490   |         |        |
|                                                   |                                                  |                                                                                   | Kif3                                                         | PFC0806W_MAL3P7.1                                    | N-8                             | Q92777                                             | 1200      | 255-98   |         |        |
|                                                   |                                                  |                                                                                   | Kif4                                                         | PFL0545W                                             | n.c.                            | Q8ISU0                                             | 1844      | 25-441   |         |        |
|                                                   |                                                  |                                                                                   | Kif5                                                         | PFL2165W                                             | M-1                             | Q8I4Y0                                             | 1351      | 65-405   |         |        |
|                                                   |                                                  |                                                                                   | Kif6                                                         | PFL2190C                                             | M-1                             | Q8I4X5                                             | 1605      | 76-642   |         |        |
|                                                   |                                                  |                                                                                   | Kif7                                                         | PFD7_0104                                            | n.c.                            | Q8BK2                                              | 1897      | 255-789  |         |        |
| Kif8                                              |                                                  |                                                                                   | MAL8P1.132                                                   | N-6                                                  | Q8IAQ6                          | 929                                                | 25-362    |          |         |        |
| Rattus norvegicus (Rat)                           |                                                  |                                                                                   | Kif1B                                                        | Kinesin-like protein KIF1B (Fragment)                | N-3                             | Q88658                                             | 689       | 3-357    |         |        |
|                                                   |                                                  |                                                                                   | Kif1C                                                        |                                                      | N-3                             | Q35787                                             | 1097      | 3-355    |         |        |
|                                                   | Kif2A                                            |                                                                                   | kinesin-like protein KIF2 [Rattus norvegicus]                | M-1                                                  | AA039241                        | 247                                                |           |          |         |        |
|                                                   | Kif2C                                            | Kinesin-like protein KIF2C (Mitotic centromere-associated kinesin)                | M-1                                                          | Q62909                                               | 671                             | 202-540                                            |           |          |         |        |
|                                                   | Kif3C                                            | Rattus norvegicus kinesin-like protein KIF3C (KIF3C) mRNA, complete cds           | N-4                                                          | AF083330_1                                           | 797                             | 8-376                                              |           |          |         |        |
|                                                   | Kif5C                                            | Kinesin heavy chain isoform 5C (Kinesin heavy chain neuron-specific 2) (Fragment) | N-1                                                          | P56536                                               | 238                             | 5-238                                              |           |          |         |        |
|                                                   | Kif6                                             | Kinesin-related protein 3A (Fragment)                                             | N-12                                                         | Q54720                                               | 486                             | 3-353                                              |           |          |         |        |
|                                                   | Kif7                                             | Kinesin-related protein KRP5 (Fragment)                                           | N-15                                                         | Q54722                                               | 168                             | 1-168                                              |           |          |         |        |
|                                                   | Kif11                                            | kinesin-related protein KRP6 [Rattus norvegicus]                                  | N-2                                                          | AAB88703                                             | 176                             | 1-176                                              |           |          |         |        |
|                                                   | Kif23                                            |                                                                                   | N-6                                                          | XP_236813                                            | 579                             |                                                    |           |          |         |        |
|                                                   | KifC1                                            | kinesin-related protein KRP1 [Rattus norvegicus]                                  | C-1                                                          | AAB88699                                             | 163                             | 1-163                                              |           |          |         |        |
| KifC3                                             | kinesin-related protein KRP4 [Rattus norvegicus] | C-3                                                                               | AAB88701                                                     | 154                                                  | 1-154                           |                                                    |           |          |         |        |
| Saccharomyces cerevisiae (Baker's yeast)          | Kip1                                             | KIP1 OR CIN9 OR YBL063W OR YBL0504 OR YBL0521                                     | N-2                                                          | P28742                                               | 1111                            | 50-418                                             |           |          |         |        |
|                                                   | Kip2                                             | KIP2 OR YPL155C OR P2581                                                          | N-13                                                         | P27243                                               | 706                             | 100-501                                            |           |          |         |        |
|                                                   | Kip3                                             | Kinesin-like protein KIP3 OR YGL216W                                              | N-9                                                          | P53086                                               | 805                             | 8-446                                              |           |          |         |        |
|                                                   | Cin8                                             | CIN8 OR KSL2 OR YEL061C                                                           | N-2                                                          | P27895                                               | 1038                            | 72-523                                             |           |          |         |        |
|                                                   | Kar3                                             | KAR3 OR YPR141C OR P9659.16                                                       | C-1                                                          | P17119                                               | 729                             | 384-729                                            |           |          |         |        |
|                                                   | Smy1                                             | SMY1 OR YKL079W OR YKL409                                                         | n.c.                                                         | P32364                                               | 656                             | 25-372                                             |           |          |         |        |
|                                                   | Schizosaccharomyces pombe (Fission yeast)        | Klp1                                                                              | PKL1 OR SPAC3A11.14C                                         | C-1                                                  | Q92376                          | 832                                                | 477-830   |          |         |        |
|                                                   |                                                  | Klp2                                                                              | SPAC144.14                                                   | n.c.                                                 | Q9UTL2                          | 511                                                | 3-364     |          |         |        |
|                                                   |                                                  | Klp3                                                                              | KLP3 OR KRP1 OR SPAC1834.07                                  | N-1                                                  | Q9US60                          | 554                                                | 1-333     |          |         |        |
|                                                   |                                                  | Klp4                                                                              | Hypothetical 70.1 kDa kinesin-like protein C1604.20C         | N-13                                                 | Q94732                          | 628                                                | 130-468   |          |         |        |
|                                                   |                                                  | Klp5                                                                              | KLP5 OR SPBC2F12.13                                          | N-8                                                  | O14343                          | 883                                                | 4-398     |          |         |        |
| Klp6                                              |                                                  | KLP6 OR SPBC1685.15C OR SPBC649.01C                                               | N-8                                                          | O59751                                               | 784                             | 4-307                                              |           |          |         |        |
| Klp7                                              |                                                  | CUT7 OR SPAC25G10.07C                                                             | N-2                                                          | P24339                                               | 1085                            | 70-429                                             |           |          |         |        |
| Klp8                                              |                                                  | SPAC64.10                                                                         | C-1                                                          | Q9US03                                               | 817                             | 471-815                                            |           |          |         |        |
| Klp9                                              |                                                  | SPBC15D4.01C OR SPBC2D10.21C                                                      | N-6                                                          | Q74307                                               | 633                             | 2-399                                              |           |          |         |        |
| Solanum tuberosum (Potato)                        |                                                  | Khc                                                                               | Kinesin heavy chain-like protein                             | C-1                                                  | Q41460                          | 1265                                               | 887-1218  |          |         |        |
|                                                   |                                                  | Strongylocentrotus purpuratus (Purple sea urchin)                                 | Krp85                                                        | Kinesin-II 85 kDa subunit (KRP-85/95 85 kDa subunit) | N-4                             | P46872                                             | 699       | 8-350    |         |        |
|                                                   | Krp95                                            |                                                                                   | Kinesin-II 95 kDa subunit (KRP-85/95 95 kDa subunit)         | N-4                                                  | P46871                          | 742                                                | 6-347     |          |         |        |
|                                                   | Krp110                                           |                                                                                   | KRP110                                                       | N-6                                                  | Q9GQ59                          | 870                                                | 21-466    |          |         |        |
|                                                   | Krp170                                           |                                                                                   | KRP170                                                       | N-2                                                  | Q9GQ58                          | 1081                                               | 11-360    |          |         |        |
|                                                   | Krp180                                           |                                                                                   | Kinesin-like protein KRP180                                  | N-10                                                 | Q9GQ70                          | 1463                                               | 16-362    |          |         |        |
|                                                   | Khc                                              |                                                                                   | Kinesin heavy chain                                          | N-1                                                  | P35978                          | 1031                                               | 6-333     |          |         |        |
|                                                   | KinC                                             |                                                                                   | Kinesin-C                                                    | n.c.                                                 | Q9U679                          | 1624                                               | 1265-1597 |          |         |        |
|                                                   | Syncephalastrum racemosum                        |                                                                                   | Synkin                                                       |                                                      | N-1                             | CAA12647                                           | 935       | 3-337    |         |        |
|                                                   |                                                  |                                                                                   | Tetrahymena thermophila                                      | Kin1                                                 | Kinesin-II homologue            | N-4                                                | Q9U0D5    | 735      | 11-349  |        |
|                                                   |                                                  |                                                                                   |                                                              | Kin2                                                 | Kinesin-II homologue            | N-4                                                | Q9U921    | 697      | 8-346   |        |
| Trypanosoma brucei                                |                                                  |                                                                                   |                                                              | KifC1                                                | C-terminal kinesin KIFC1        | C-3                                                | Q9GSA9    | 820      | 487-819 |        |
|                                                   |                                                  | Khc                                                                               |                                                              | Possible KIAA0531 protein                            | N-1                             | Q9N8W9                                             | 886       | 8-403    |         |        |
|                                                   |                                                  | Ustilago maydis (Smut fungus)                                                     |                                                              | Kin1                                                 | Kinesin motor protein           | N-7                                                | P87198    | 1459     | 234-634 |        |
|                                                   |                                                  |                                                                                   |                                                              | Kin2                                                 | Kinesin motor protein           | N-1                                                | P87199    | 968      | 2-341   |        |
|                                                   |                                                  |                                                                                   |                                                              | Kin3                                                 |                                 | N-3                                                | Q8TG36    | 1676     | 4-369   |        |
|                                                   |                                                  |                                                                                   |                                                              | Xenopus laevis (African clawed frog)                 | Klp1                            | Chromosome-associated kinesin KLP1 (Chromokinesin) | N-5       | Q91784   | 1226    | 6-345  |
|                                                   |                                                  |                                                                                   |                                                              |                                                      | Klp2                            | KLP2 protein                                       | N-10      | Q91785   | 1388    | 24-372 |
|                                                   |                                                  |                                                                                   |                                                              |                                                      | Klp3                            | Kinesin like protein 3                             | N-4       | Q93478   | 744     | 7-348  |
|                                                   | Klp4                                             |                                                                                   |                                                              |                                                      | Kinesin-like protein (Fragment) | N-3                                                | Q9DDA6    | 1499     | 1-386   |        |
|                                                   | Klp22                                            |                                                                                   | Similar to kinesin family member 22 (Fragment)               |                                                      | N-16                            | AAH43733                                           | 963       | 42-380   |         |        |
|                                                   | Kif2                                             |                                                                                   | product: "kinesin-related protein Xif2"                      |                                                      | Kif2                            | U30486                                             | 706       | 220-558  |         |        |
| Kif19A                                            | Similar to hypothetical protein FLJ37300         |                                                                                   | N-8                                                          |                                                      | AAH44083                        | 997                                                | 9-354     |          |         |        |
| CENP-E                                            | XENP-E                                           |                                                                                   | N-7                                                          |                                                      | Q42263                          | 2954                                               | 4-338     |          |         |        |

|                  |       |                                         |      |        |      |          |
|------------------|-------|-----------------------------------------|------|--------|------|----------|
|                  | Kid   | Chromokinesin Xkid                      | N-18 | Q9I8K0 | 651  | 29-367   |
|                  | Kcm1  | Kinesin central motor 1 (XKCM1)         | M-1  | Q91636 | 730  | 280-698  |
|                  | Clk2  | Carboxy-terminal kinesin 2 (XCTK2)      | C-1  | P79955 | 643  | 292-641  |
|                  | Eg5A  | Kinesin-related motor protein Eg5 1     | N-2  | P28025 | 1060 | 9-360    |
|                  | Eg5B  | Kinesin-related motor protein Eg5 2     | N-2  | Q91783 | 1067 | 16-367   |
| Zea mays (Maize) | Kin1  | Kinesin heavy chain (Fragment)          | N-14 | Q93XG3 | 766  | 1-249    |
|                  | Kin2  | Kinesin heavy chain (Fragment)          | N-14 | Q93XG2 | 765  | 1-222    |
|                  | Kin3  | Kinesin heavy chain (Fragment)          | M-2  | Q93XG1 | 328  | 1-212    |
|                  | Kin4  | Kinesin heavy chain (Fragment)          | N-2  | Q93XG0 | 992  | 50-409   |
|                  | Kin5  | Kinesin heavy chain (Fragment)          | M-2  | Q93XF9 | 407  | 1-308    |
|                  | Kin6  | Kinesin heavy chain (Fragment)          | C-1  | Q93XF8 | 347  | 3-346    |
|                  | Kin8  | Kinesin heavy chain (Fragment)          | N-2  | Q93XF7 | 1079 | 53-437   |
|                  | Kin9  | Kinesin heavy chain (Fragment)          | M-1  | Q93XF6 | 430  | 1-155    |
|                  | Kin11 | Kinesin heavy chain (Fragment)          | C-1  | Q93XF5 | 354  | 1-273    |
|                  | Kin13 | Kinesin heavy chain (Fragment)          | N-10 | Q93XF4 | 857  | 1-209    |
|                  | Kin15 | Kinesin heavy chain (Fragment)          | N-14 | Q93XF3 | 897  | 1-323    |
|                  | Kin16 | Kinesin heavy chain (Fragment)          | M-2  | Q93XF2 | 405  | 1-246    |
|                  | KCBP  | Kinesin-like calmodulin binding protein | C-4  | Q9FQL7 | 1200 | 822-1153 |
